# Supplementary material for: Endozoicomonas genomes reveal functional adaptation and plasticity in bacterial strains symbiotically associated with diverse marine hosts
Source: PubMed Central journal article supplement (PMC5240137; doi:10.1038/srep40579), 2017-01-17
Supplement: srep40579-s1.pdf [file srep40579-s1.pdf]

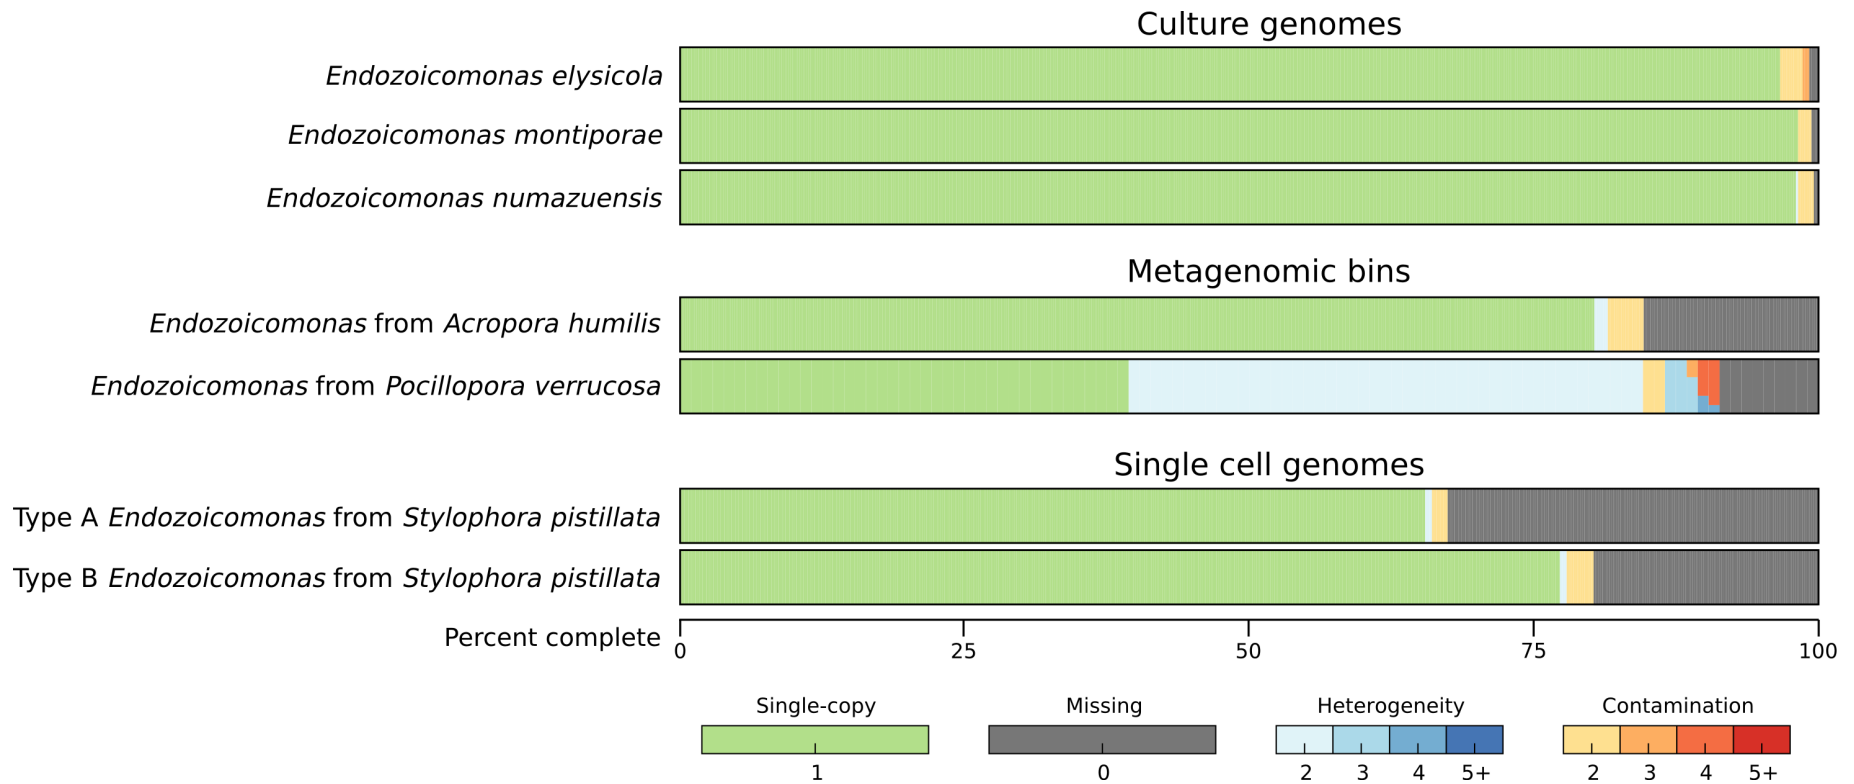

**Supplementary Figure 1.** Completeness and contamination of the *Endozoicomonas* genomes obtained using cultured isolates, metagenomic binning and single cell genomics. The completeness and contamination estimates are based on essential single copy genes, which are expected to be present in all genomes.

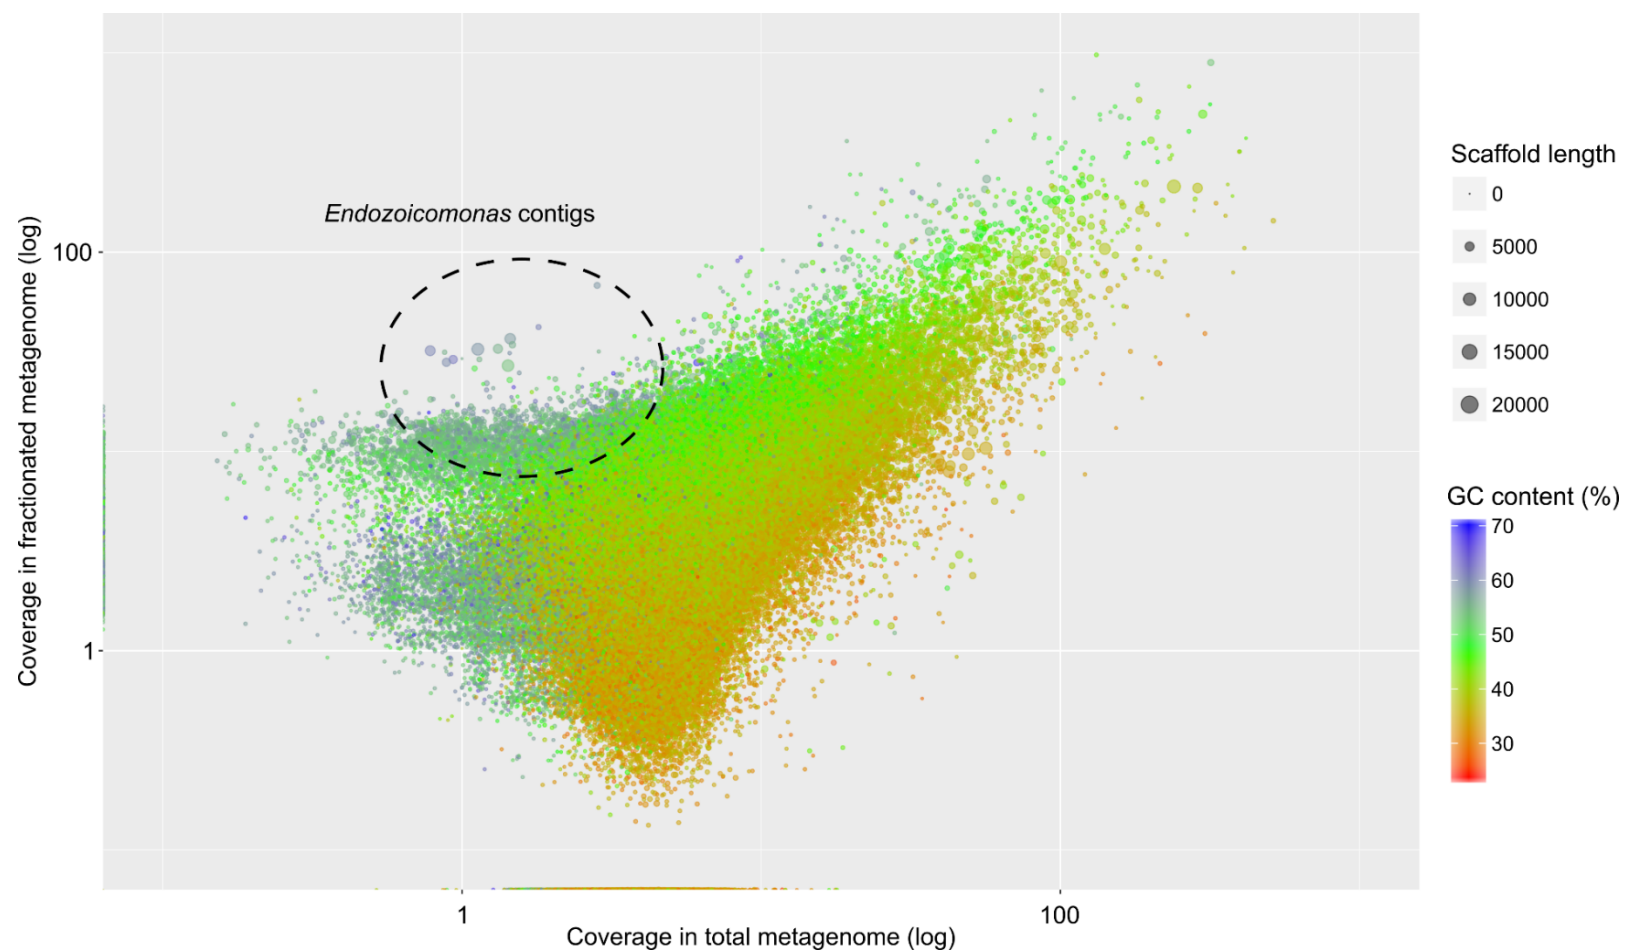

**Supplementary Figure 2.** Example of binning *Endozoicomonas* contigs from a metagenome of the coral *Pocillopora verrucosa*. *Endozoicomonas* contigs are differentiated by a higher GC content and smaller physical size (i.e. higher coverage in the fractionated metagenome). The location of *Endozoicomonas* contigs is confirmed later in the binning procedure by overlaying essential single copy genes.

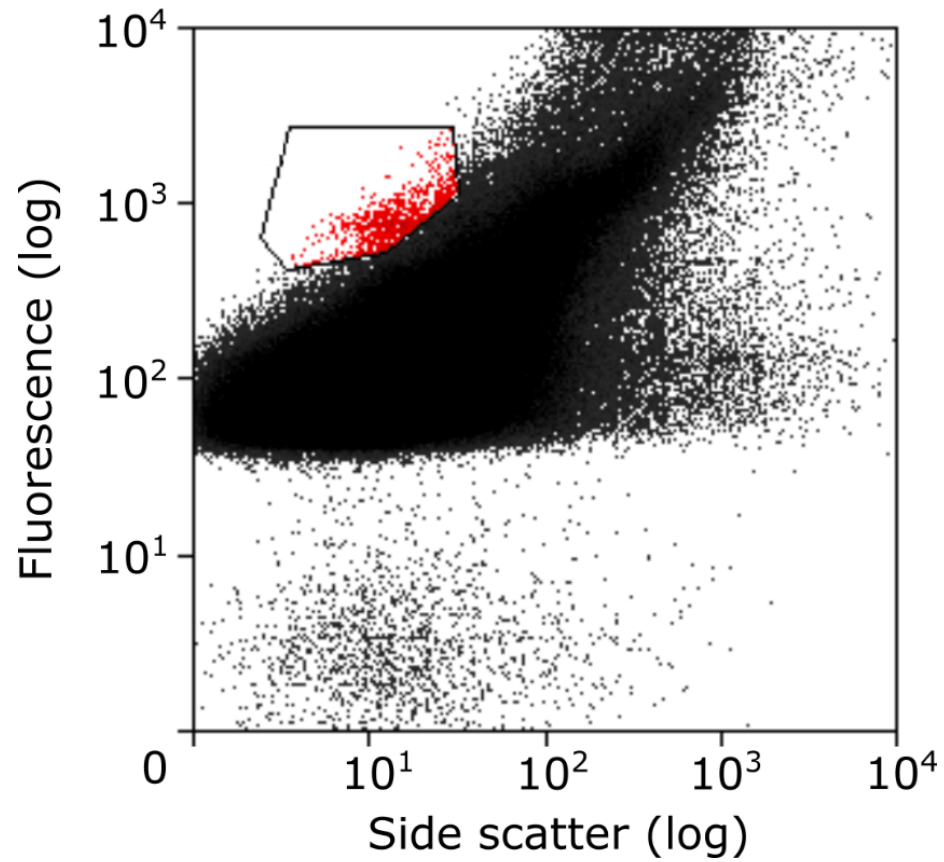

**Supplementary Figure 3.** Fluorescent activated cell sorting (FACS) of homogenized coral cells. Fluorescence intensity is plotted against side-scatter intensity and cells that are within the expected bacterial size parameters (colored red) were collected for further testing and identification.

**Supplementary Table 1.** HiSeq sequence statistics including number of final reads used for *Endozoicomonas* genome assemblies.

| Genome                                                                     | Technique            | Total reads | Cleaned reads | Final assembled reads (after binning) |
|----------------------------------------------------------------------------|----------------------|-------------|---------------|---------------------------------------|
| <i>Endozoicomonas</i> from <i>Stylophora pistillata</i> (Type A; 10 cells) | Single cell genomics | 94,915,874  | 89,901,144    | 89,901,144                            |
| <i>Endozoicomonas</i> from <i>Stylophora pistillata</i> (Type B; 3 cells)  | Single cell genomics | 27,630,137  | 25,971,750    | 25,971,750                            |
| <i>Endozoicomonas</i> from <i>Acropora humilis</i>                         | Metagenomics         | 25,640,269  | 21,531,090    | 138,898                               |
| <i>Endozoicomonas</i> from <i>Pocillopora verrucosa</i>                    | Metagenomics         | 21,704,023  | 16,871,594    | 1,021,516                             |

**Supplementary Table 2.** Number of genes annotated into each RAST subsystem classification.

| Subsystem                                          | <i>Endozoicomonas elysicola</i> | <i>Endozoicomonas</i> from <i>Acropora humilis</i> | <i>Endozoicomonas montiporae</i> | <i>Endozoicomonas numazuensis</i> | <i>Endozoicomonas</i> from <i>Stylophora pistillata</i> (Type A) | <i>Endozoicomonas</i> from <i>Stylophora pistillata</i> (Type B) | <i>Endozoicomonas</i> from <i>Pocillopora verrucosa</i> |
|----------------------------------------------------|---------------------------------|----------------------------------------------------|----------------------------------|-----------------------------------|------------------------------------------------------------------|------------------------------------------------------------------|---------------------------------------------------------|
| Amino Acids and Derivatives                        | 465                             | 155                                                | 359                              | 349                               | 103                                                              | 174                                                              | 260                                                     |
| Carbohydrates                                      | 439                             | 111                                                | 337                              | 362                               | 94                                                               | 149                                                              | 255                                                     |
| Cell Division and Cell Cycle                       | 25                              | 21                                                 | 34                               | 24                                | 46                                                               | 36                                                               | 48                                                      |
| Cell Wall and Capsule                              | 168                             | 71                                                 | 137                              | 170                               | 102                                                              | 87                                                               | 97                                                      |
| Cofactors, Vitamins, Prosthetic Groups, Pigments   | 284                             | 93                                                 | 279                              | 297                               | 73                                                               | 146                                                              | 282                                                     |
| DNA Metabolism                                     | 110                             | 59                                                 | 152                              | 143                               | 105                                                              | 97                                                               | 110                                                     |
| Dormancy and Sporulation                           | 3                               | 2                                                  | 4                                | 3                                 | 2                                                                | 3                                                                | 6                                                       |
| Fatty Acids, Lipids, and Isoprenoids               | 155                             | 44                                                 | 120                              | 155                               | 52                                                               | 59                                                               | 114                                                     |
| Iron acquisition and metabolism                    | 33                              | 9                                                  | 10                               | 32                                | 23                                                               | 19                                                               | 7                                                       |
| Membrane Transport                                 | 149                             | 79                                                 | 132                              | 181                               | 46                                                               | 61                                                               | 83                                                      |
| Metabolism of Aromatic Compounds                   | 19                              | 13                                                 | 37                               | 16                                | 4                                                                | 6                                                                | 12                                                      |
| Miscellaneous                                      | 21                              | 5                                                  | 23                               | 22                                | 16                                                               | 14                                                               | 19                                                      |
| Motility and Chemotaxis                            | 10                              | 0                                                  | 75                               | 74                                | 4                                                                | 13                                                               | 35                                                      |
| Nitrogen Metabolism                                | 31                              | 10                                                 | 29                               | 33                                | 3                                                                | 4                                                                | 8                                                       |
| Nucleosides and Nucleotides                        | 146                             | 56                                                 | 121                              | 110                               | 27                                                               | 56                                                               | 105                                                     |
| Phages, Prophages, Transposable elements, Plasmids | 6                               | 1                                                  | 32                               | 14                                | 5                                                                | 10                                                               | 7                                                       |
| Phosphorus Metabolism                              | 44                              | 29                                                 | 47                               | 50                                | 23                                                               | 36                                                               | 50                                                      |
| Photosynthesis                                     | 0                               | 0                                                  | 0                                | 0                                 | 0                                                                | 0                                                                | 0                                                       |
| Potassium metabolism                               | 26                              | 10                                                 | 17                               | 19                                | 18                                                               | 13                                                               | 21                                                      |
| Protein Metabolism                                 | 251                             | 82                                                 | 263                              | 258                               | 112                                                              | 196                                                              | 152                                                     |
| RNA Metabolism                                     | 126                             | 66                                                 | 180                              | 195                               | 80                                                               | 88                                                               | 202                                                     |
| Regulation and Cell signaling                      | 65                              | 28                                                 | 43                               | 75                                | 12                                                               | 24                                                               | 52                                                      |
| Respiration                                        | 117                             | 49                                                 | 121                              | 107                               | 63                                                               | 67                                                               | 97                                                      |
| Secondary Metabolism                               | 4                               | 4                                                  | 4                                | 4                                 | 0                                                                | 0                                                                | 0                                                       |
| Stress Response                                    | 148                             | 45                                                 | 109                              | 138                               | 39                                                               | 66                                                               | 118                                                     |
| Sulfur Metabolism                                  | 51                              | 7                                                  | 25                               | 32                                | 10                                                               | 10                                                               | 19                                                      |
| Virulence, Disease and Defense                     | 96                              | 30                                                 | 83                               | 68                                | 25                                                               | 39                                                               | 55                                                      |

**Supplementary Table 3.** Number of genes in the RAST “amino acid and derivatives” classification.

| Subsystem                                   | <i>Endozoicomonas elysicola</i> | <i>Endozoicomonas</i> from <i>Acropora humilis</i> | <i>Endozoicomonas montiporae</i> | <i>Endozoicomonas numazuensis</i> | <i>Endozoicomonas</i> from <i>Stylophora pistillata</i> (Type A) | <i>Endozoicomonas</i> from <i>Stylophora pistillata</i> (Type B) | <i>Endozoicomonas</i> from <i>Pocillopora verrucosa</i> |
|---------------------------------------------|---------------------------------|----------------------------------------------------|----------------------------------|-----------------------------------|------------------------------------------------------------------|------------------------------------------------------------------|---------------------------------------------------------|
| Alanine, serine, and glycine                | 48                              | 16                                                 | 48                               | 16                                | 21                                                               | 34                                                               | 19                                                      |
| Arginine; urea cycle, polyamines            | 104                             | 3                                                  | 73                               | 3                                 | 40                                                               | 50                                                               | 105                                                     |
| Aromatic amino acids and derivatives        | 56                              | 30                                                 | 65                               | 30                                | 11                                                               | 18                                                               | 51                                                      |
| Branched-chain amino acids                  | 115                             | 53                                                 | 49                               | 53                                | 0                                                                | 0                                                                | 7                                                       |
| Glutamine, glutamate, aspartate, asparagine | 28                              | 17                                                 | 25                               | 17                                | 9                                                                | 11                                                               | 16                                                      |
| Histidine Metabolism                        | 15                              | 6                                                  | 17                               | 6                                 | 0                                                                | 4                                                                | 0                                                       |
| Lysine, threonine, methionine, and cysteine | 80                              | 24                                                 | 66                               | 24                                | 20                                                               | 49                                                               | 51                                                      |
| Proline and 4-hydroxyproline                | 16                              | 4                                                  | 14                               | 4                                 | 2                                                                | 8                                                                | 11                                                      |
